# Supplementary material for: Distribution and fluxes of marine particles in the South China Sea continental slope: implications for carbon export
Source: Copernicus journal article supplement (doi:10.5194/egusphere-2025-2034), 2025-05-27
Supplement: Supplementary file 1 [file egusphere-2025-2034-supplement.pdf]

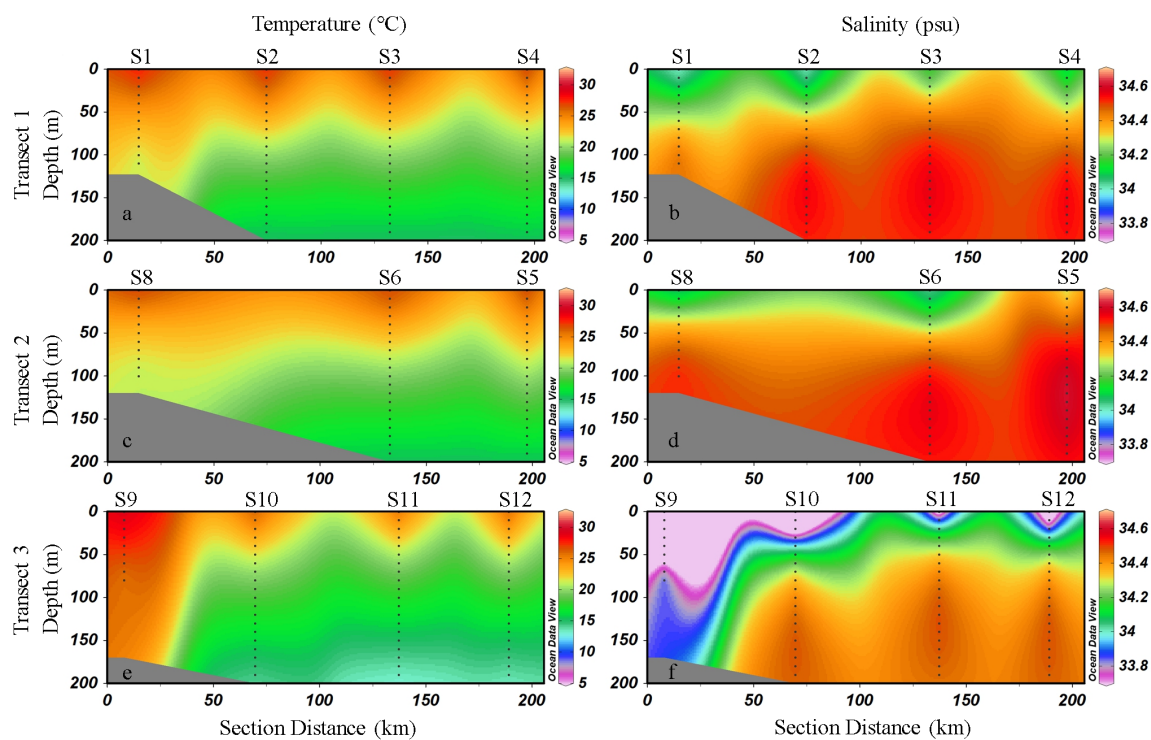

Fig. S1. Sectional distributions of temperature (°C) and salinity (psu) in the upper 200 m layer in the study area. Transect 1: temperature (a, °C), salinity (b, psu); Transect 2: temperature (c, °C), salinity (d, psu); Transect 3: temperature (e, °C), salinity (f, psu)

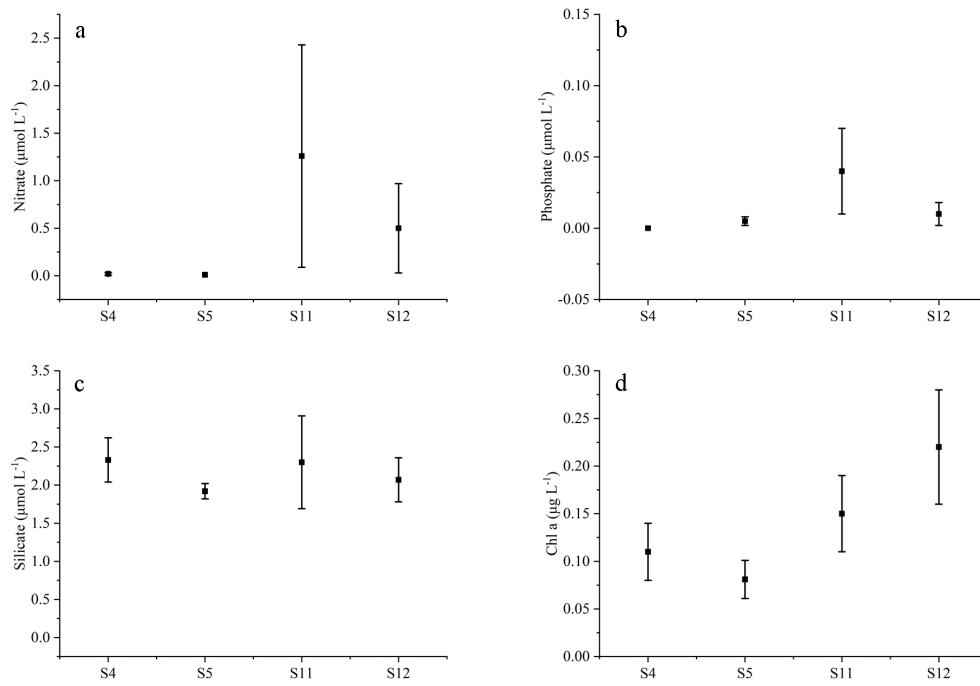

Fig. S2. Mean concentrations of nutrients and Chl *a* in the upper 50 m water layer at stations located in the anticyclonic eddy region (S4, S5) and cyclonic eddy region (S11, S12). a: nitrate ( $\mu\text{mol L}^{-1}$ ); b: phosphate ( $\mu\text{mol L}^{-1}$ ); c: silicate ( $\mu\text{mol L}^{-1}$ ); d: Chl *a* ( $\mu\text{g L}^{-1}$ ).

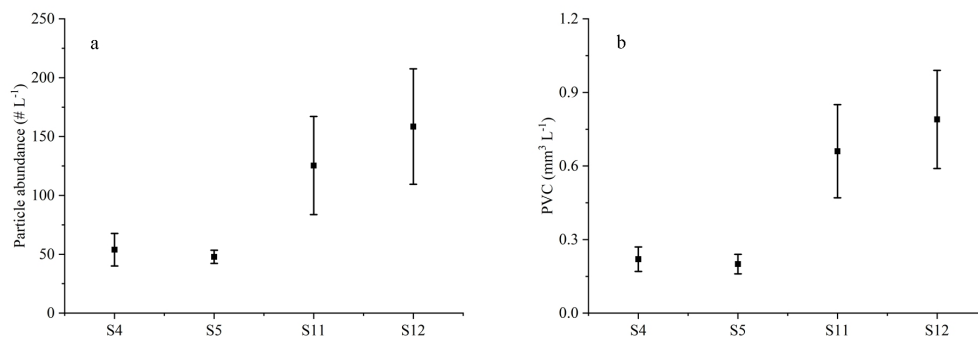

Fig. S3. Mean concentrations of particle abundance (a) and PVC (b) in the upper 50 m water layer at stations located in the anticyclonic eddy region (S4, S5) and cyclonic eddy region (S11, S12).

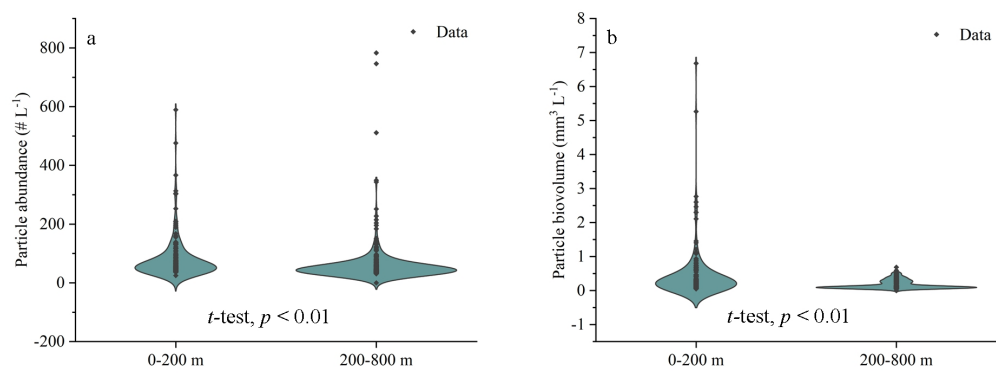

Fig. S4. Comparison of particle abundance (# L<sup>-1</sup>) and PVC (mm<sup>3</sup> L<sup>-1</sup>) between shallow waters (0–200 m) and deep waters (200–800 m). a: abundance (# L<sup>-1</sup>); b: PVC (mm<sup>3</sup> L<sup>-1</sup>).

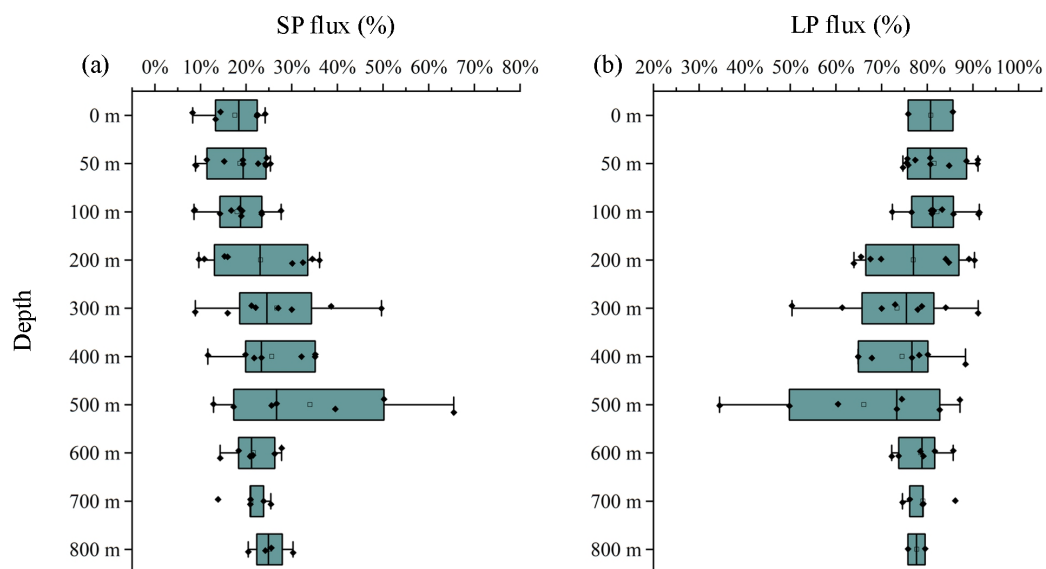

Fig. S5. Contribution of small and large particles to POC flux at different depths. Box plots show the median value (mid-line), the 25% and 75% quantiles (box), and the 5% and 95% quantiles (whiskers). SP: small particles; LP: large particles.
